# Supplementary material for: A green strategy for co-production of xylooligosaccharides and fermentable sugars from birch via tween-assisted tartaric acid pretreatment
Source: Royal Society of Chemistry journal article supplement (doi:10.1039/d5gc06066d), 2026-01-01
Supplement: d5gc06066d1.pdf [file d5gc06066d1.pdf]

## Supporting Information

### A Green Strategy for Co-production of Xylooligosaccharides and Fermentable Sugars from Birch via Tween-assisted Tartaric Acid

#### Pretreatment

Rutong Jiang<sup>a 1</sup>, Bin Bian<sup>a 1</sup>, Ruoyan Li<sup>a 1</sup>, Qijun Wu<sup>a</sup>, Daihui Zhang<sup>a</sup>, Caoxing Huang<sup>a</sup>,  
Chenhuan Lai<sup>a, b \*</sup>, Mi Li<sup>c \*</sup>, Qiang Yong<sup>a, b</sup>

<sup>a</sup>State Key Laboratory for Development and Utilization of Forest Food Resources,  
Nanjing Forestry University, Nanjing 210037, China

<sup>b</sup>Jiangsu Co-Innovation Center of Efficient Processing and Utilization of Forest  
Resources, College of Chemical Engineering, Nanjing Forestry University, Nanjing  
210037, China.

<sup>c</sup>Center for Renewable Carbon, School of Natural Resources, University of Tennessee,  
Knoxville, TN 37996, USA

\*Corresponding author

Email: lch2014@njfu.edu.cn (C. Lai); mli47@utk.edu (M. Li)

<sup>1</sup>Rutong Jiang, Bin Bian and Ruoyan Li contributed equally to this work, regarding as  
the first author

**Table S1.** Chemical composition of birch and birch pretreated with tartaric acid (TA).

| Temperature<br>(°C) | Time (min<br>) | TA<br>concentration<br>(%) | Contents (%) |            |            | Recovery Yield<br>(%) |       | Delignification<br>(%) |
|---------------------|----------------|----------------------------|--------------|------------|------------|-----------------------|-------|------------------------|
|                     |                |                            | Glucan       | Xylan      | Lignin     | Glucan                | Xylan |                        |
|                     | Raw birch      |                            | 39.6 ± 0.5   | 24.3 ± 0.3 | 27.7 ± 0.2 | /                     | /     | /                      |
| 170                 | 30             | 0.0                        | 42.2 ± 0.4   | 19.4 ± 0.1 | 23.6 ± 0.2 | 94.8                  | 29.3  | 4.6                    |
|                     |                | 0.1                        | 42.9 ± 0.1   | 18.7 ± 0.1 | 21.1 ± 0.7 | 95.4                  | 32.3  | 15.6                   |
|                     |                | 0.2                        | 45.7 ± 0.1   | 16.4 ± 0.1 | 24.1 ± 0.2 | 98.8                  | 42.2  | 6.0                    |
|                     |                | 0.3                        | 46.8 ± 0.2   | 14.6 ± 0.1 | 24.5 ± 0.4 | 97.1                  | 50.9  | 8.5                    |
|                     |                | 0.4                        | 49.2 ± 1.0   | 13.5 ± 0.1 | 24.3 ± 0.1 | 97.6                  | 64.5  | 9.7                    |
|                     |                | 0.5                        | 50.0 ± 0.6   | 11.4 ± 0.1 | 29.1 ± 0.2 | 95.0                  | 64.7  | 0.6                    |
|                     |                | 0.6                        | 51.2 ± 0.4   | 9.9 ± 0.2  | 30.1 ± 0.5 | 93.3                  | 70.8  | 1.3                    |
| 170                 | 30             | 0.4                        | 49.2 ± 1.0   | 13.5 ± 0.0 | 24.3 ± 0.1 | 97.2                  | 56.5  | 13.6                   |
|                     | 40             |                            | 50.2 ± 0.2   | 12.3 ± 0.2 | 25.1 ± 0.3 | 98.2                  | 68.9  | 6.9                    |
|                     | 50             |                            | 56.7 ± 0.2   | 7.8 ± 0.1  | 29.8 ± 0.1 | 98.4                  | 77.9  | 6.7                    |
|                     | 60             |                            | 57.0 ± 0.1   | 7.7 ± 0.1  | 29.9 ± 0.6 | 97.5                  | 78.7  | 7.8                    |
|                     | 70             |                            | 57.5 ± 0.5   | 6.0 ± 0.1  | 30.4 ± 0.3 | 97.5                  | 83.4  | 7.2                    |
| 150                 | 40             | 0.4                        | 40.2 ± 0.2   | 19.2 ± 0.3 | 21.9 ± 0.1 | 97.4                  | 24.2  | 4.5                    |
| 160                 |                |                            | 44.1 ± 0.3   | 17.9 ± 0.0 | 23.1 ± 0.3 | 95.9                  | 36.8  | 9.5                    |
| 170                 |                |                            | 50.2 ± 0.2   | 12.3 ± 0.2 | 25.1 ± 0.3 | 94.9                  | 62.2  | 8.2                    |
| 180                 |                |                            | 56.1 ± 0.5   | 6.7 ± 0.2  | 29.8 ± 0.2 | 96.8                  | 81.2  | 7.4                    |
| 190                 |                |                            | 59.0 ± 0.2   | 3.9 ± 0.0  | 31.7 ± 0.2 | 93.0                  | 90.0  | 10.0                   |

**Table S2.** Chemical composition and cellulose accessibility of Tween-assisted tartaric acid pretreated birch.

| <b>Biomass<sup>a</sup></b> | <b>Glucan (%)</b> | <b>Xylan (%)</b> | <b>Lignin (%)</b> | <b>Solid recovery (%)</b> | <b>Glucan recovery (%)</b> | <b>Xylan removal (%)</b> | <b>Lignin removal (%)</b> | <b>Accessibility (mg/g)</b> |
|----------------------------|-------------------|------------------|-------------------|---------------------------|----------------------------|--------------------------|---------------------------|-----------------------------|
| TA                         | 55.5 ± 0.3        | 11.2 ± 0.1       | 30.2 ± 0.2        | 66.7 ± 0.2                | 93.4 ± 0.4                 | 69.0 ± 0.5               | 8.2 ± 0.3                 | 266.1                       |
| 0.5%TW-TA                  | 53.4 ± 0.2        | 11.3 ± 0.0       | 29.4 ± 0.7        | 70.9 ± 0.1                | 95.6 ± 0.2                 | 67.0 ± 0.1               | 5.3 ± 0.5                 | 320.7                       |
| 1%TW-TA                    | 55.1 ± 0.1        | 9.8 ± 0.1        | 29.3 ± 0.1        | 70.0 ± 0.1                | 97.4 ± 0.3                 | 71.5 ± 0.7               | 6.6 ± 0.6                 | 325.3                       |
| 2%TW-TA                    | 55.1 ± 1.0        | 11.1 ± 0.0       | 26.7 ± 0.1        | 67.5 ± 0.6                | 93.9 ± 0.1                 | 69.1 ± 0.1               | 18.1 ± 0.3                | 332.5                       |

<sup>a</sup> TA refers to birch pretreated with 0.4% (w/v) tartaric acid at 170 °C for 40 min; 0.5%TW-TA refers to birch pretreated with 0.4% (w/v) tartaric acid and 0.5% (w/v) Tween at 170 °C for 40 min.

**Table S3.** Semi-quantitative analysis of inter-unit linkages and subunits in lignins from pretreated birch.

| Lignin substructure       | MWL <sup>a</sup> | MWL-<br>0.5%TW <sup>b</sup> | MWL-2.0%TW <sup>c</sup> |
|---------------------------|------------------|-----------------------------|-------------------------|
| $\beta$ -O-4 <sup>d</sup> | 76.4(55.2)       | 75.4(54.0)                  | 73.2(45.0)              |
| $\beta$ - $\beta$         | 19.3(14.0)       | 20.0(14.3)                  | 21.2(13.0)              |
| $\beta$ -5                | 4.3(3.1)         | 4.6(3.3)                    | 5.6(3.4)                |
| Syringyl (S)              | 74.4             | 72.6                        | 71.8                    |
| Guaiacyl (G)              | 25.6             | 27.4                        | 28.2                    |
| S/G                       | 2.9              | 2.6                         | 2.5                     |

<sup>a</sup> MWL refers to milled wood lignin isolated from tartaric acid pretreated birch;

<sup>b</sup> MWL-0.5%TW refers to milled wood lignin isolated from tartaric acid pretreated birch with 0.5% Tween;

<sup>c</sup> MWL-2.0%TW refers to milled wood lignin isolated from tartaric acid pretreated birch with 2.0% Tween;

<sup>d</sup> Linkages contents expressed per 100 Ar (and as percentages of total side chains).

**Table S4.** Contribution of amino acid residues, interaction forces, and binding energies in the molecular docking results between lignin model compounds and endoglucanase.

| Lignin model <sup>a</sup> | Hydrogen bonding forces                | Amino acid residue                                                                                                                                                                              |               |                |              | Binding energy (kcal/mol) |
|---------------------------|----------------------------------------|-------------------------------------------------------------------------------------------------------------------------------------------------------------------------------------------------|---------------|----------------|--------------|---------------------------|
|                           |                                        | Van der Waals force                                                                                                                                                                             | $\pi$ - $\pi$ | $\pi$ -Alkyl   | Amide- $\pi$ |                           |
| SG                        | ASN328, SER332                         | GLN325, ASN328, ASN334, GLY333, ASN227, GLY230, TRP329, SER340, SER324, ALA222, THR341, ALA222, SER340, GLN325, ALA208, GLY225, ASN227, GLY230, ALA335, GLY223, SER324, TRP329, ASN334, GLY333, | /             | ALA335         | ASN328       | -7.644                    |
|                           |                                        | SER332, GLN325, GLN178, SER221, ASP172, SER295, THR341, ILE290, THR289, PHE226, THR210, HIS212, SER144, SER318, TYR38, SER106, GLN178, TYR170                                                   |               |                |              |                           |
| SG-TWN                    | SER318, ARG108, ASN328, SER340, GLY223 | SER332, GLN325, GLN178, SER221, ASP172, SER295, THR341, ILE290, THR289, PHE226, THR210, HIS212, SER144, SER318, TYR38, SER106, GLN178, TYR170                                                   | TRP320        | TYR326, PRO176 | /            | -6.815                    |

<sup>a</sup> SG refers to syringyl–guaiacyl  $\beta$ -O-4 lignin dimer;

<sup>b</sup> SG-TWN refers to Tween-modified SG molecular models.

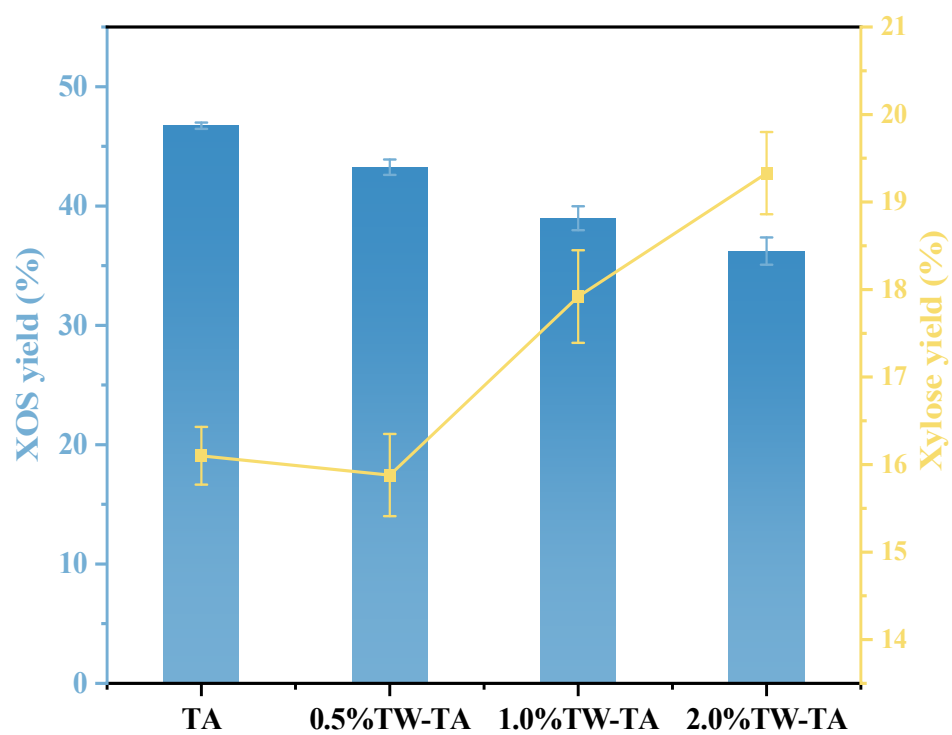

**Fig. S1.** Effects of Tween-assisted tartaric acid pretreatment on XOS production from birch.

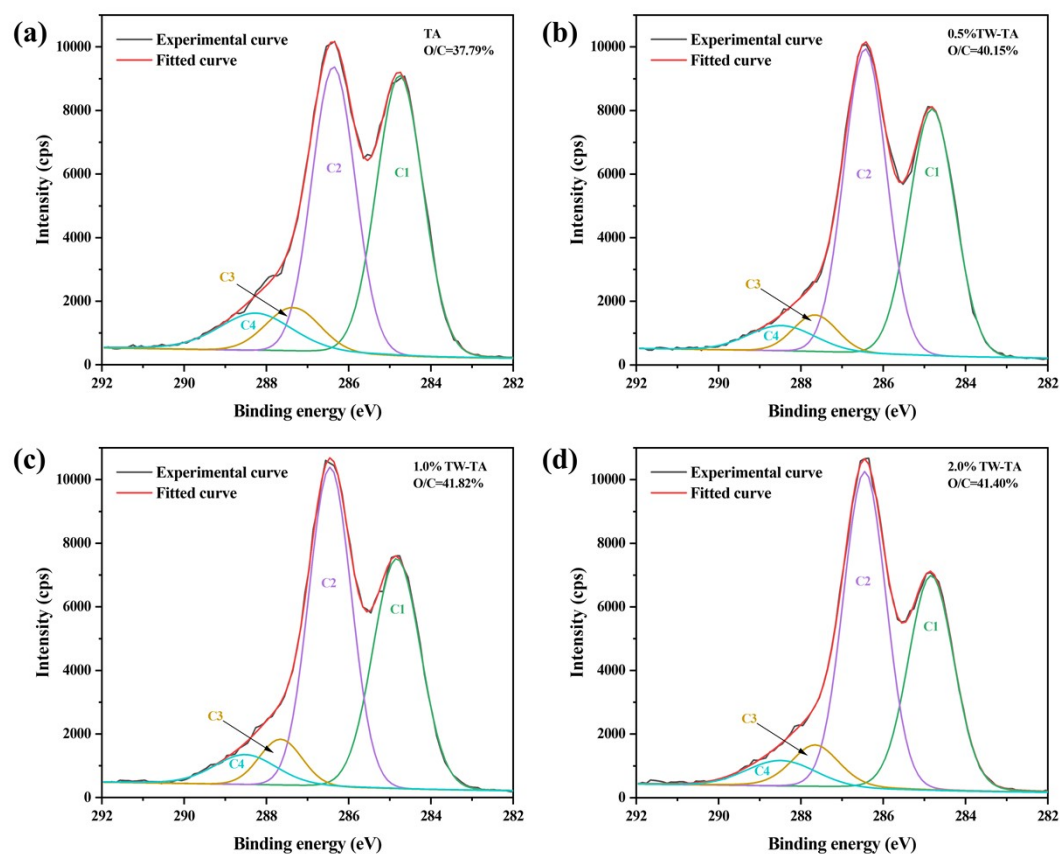

**Fig. S2.** Curve-fitted high-resolution XPS spectra of Tween-assisted tartaric acid pretreated birch: (a) TA (without Tween); (b) 0.5%TW-TA (with 0.5% Tween); (c) 1.0%TW-TA (with 1.0% Tween); (d) 2.0%TW-TA (with 2.0% Tween).

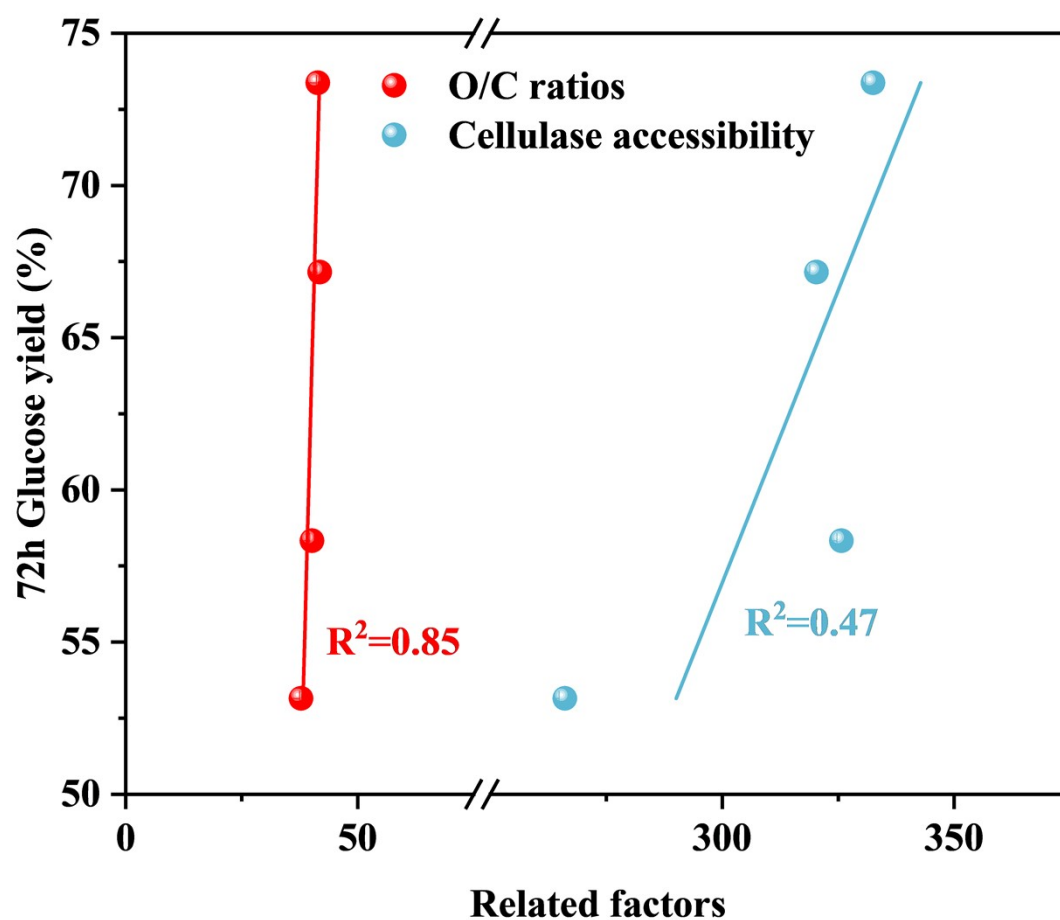

**Fig. S3.** Correlation analysis between O/C ratio and cellulase accessibility with 72 h glucose yield of pretreated substrates.



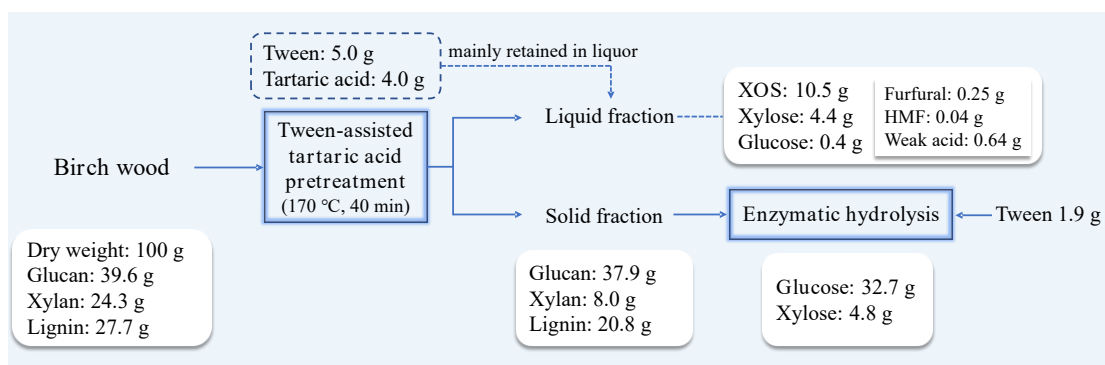

**Fig. S4. Mass balance for the co-production of XOS and fermentable sugars based on Tween-assisted tartaric acid pretreatment.**

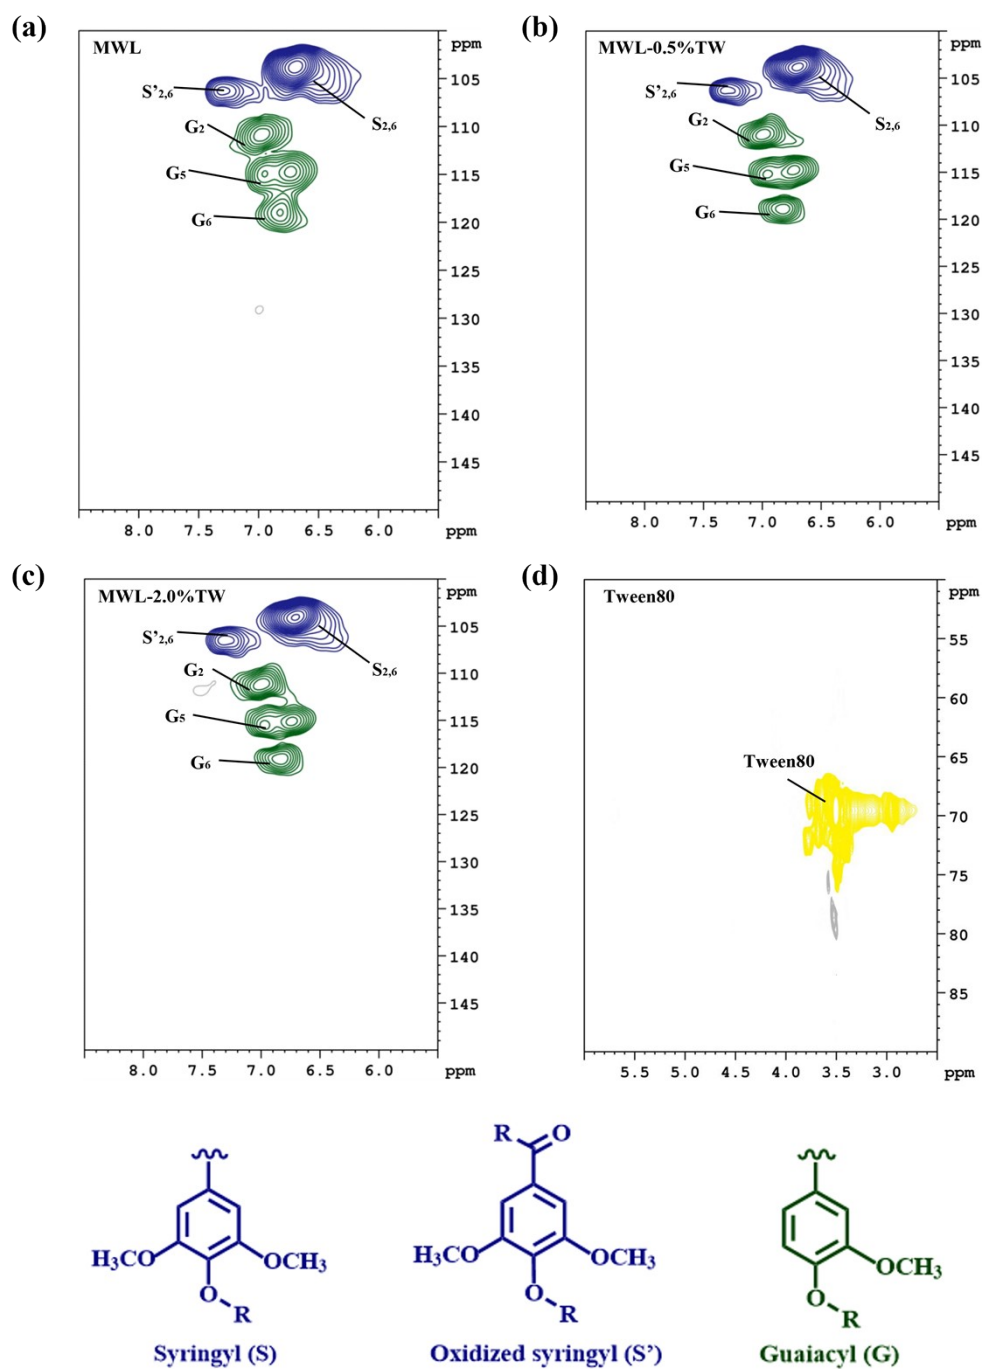

**Fig. S5.** Aromatic region in 2D HSQC NMR spectra of the milled wood lignins isolated from pretreated substrates: MWL (a); MWL-0.5%TW (b); MWL-2.0%TW (c); side-chain region in 2D HSQC spectra of Tween80 (d).

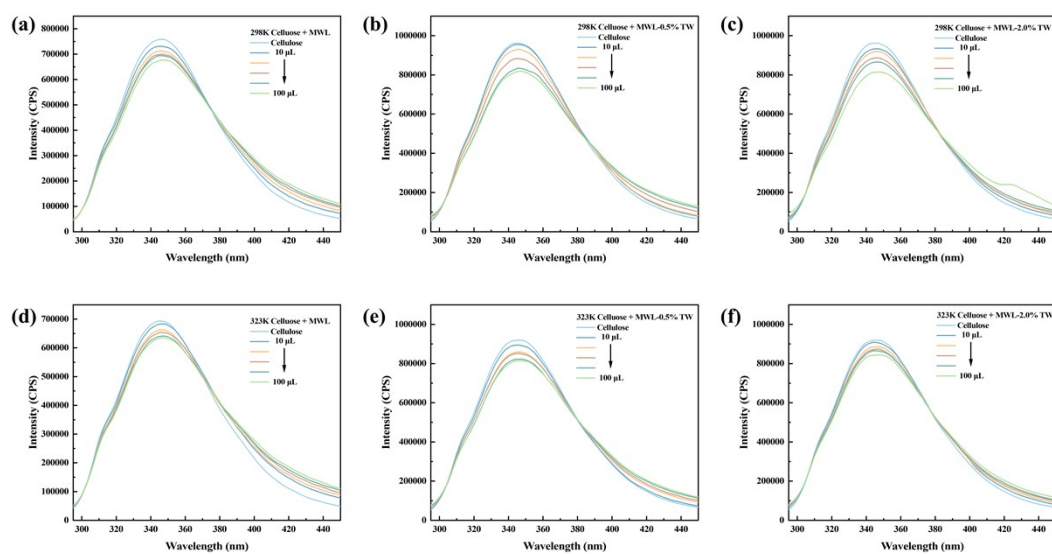

**Fig. S6.** Fluorescence emission spectra of cellulase titrated with different concentrations of MWL, MWL-0.5%TW, MWL-2.0%TW at 298 K (a, b, c) and 323 K (d, e, f).  $\lambda_{\text{ex}} = 280 \text{ nm}$ ,  $\lambda_{\text{em}} = 295\text{--}500 \text{ nm}$ .

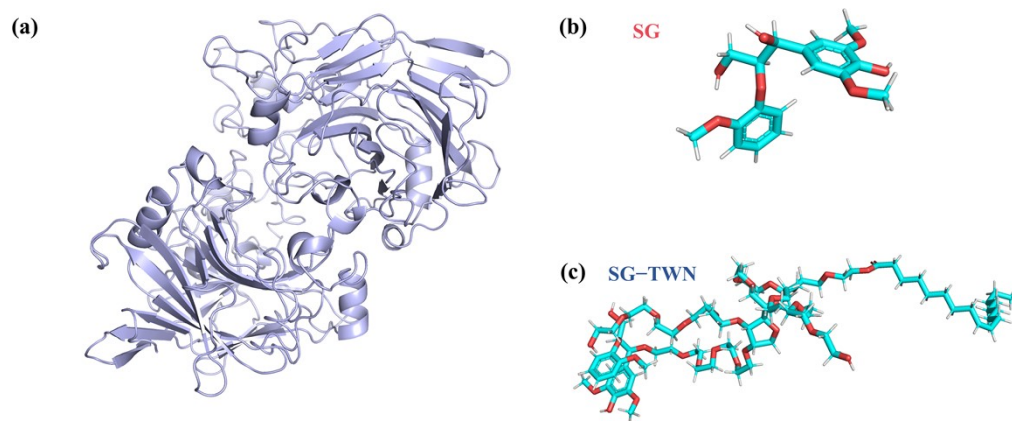

**Fig. S7.** Structure of endo- $\beta$ -1,4-glucanase (a, PDB ID: 1EG1), SG (b), and SG-TWN

(c).
